# Supplementary material for: Random telegraph noise and resistance switching analysis of oxide based resistive memory
Source: Royal Society of Chemistry journal article supplement (doi:10.1039/c3nr05016e), 2013-10-17
Supplement: c3nr05016e.pdf [file c3nr05016e.pdf]

# Supplementary Information to “Random Telegraph Noise and Resistance Switching Analysis of Oxide Based Resistive Memory”

*Shinhyun Choi, Yuchao Yang, and Wei Lu\**

Department of Electrical Engineering and Computer Science, University of Michigan, MI,  
48109, USA

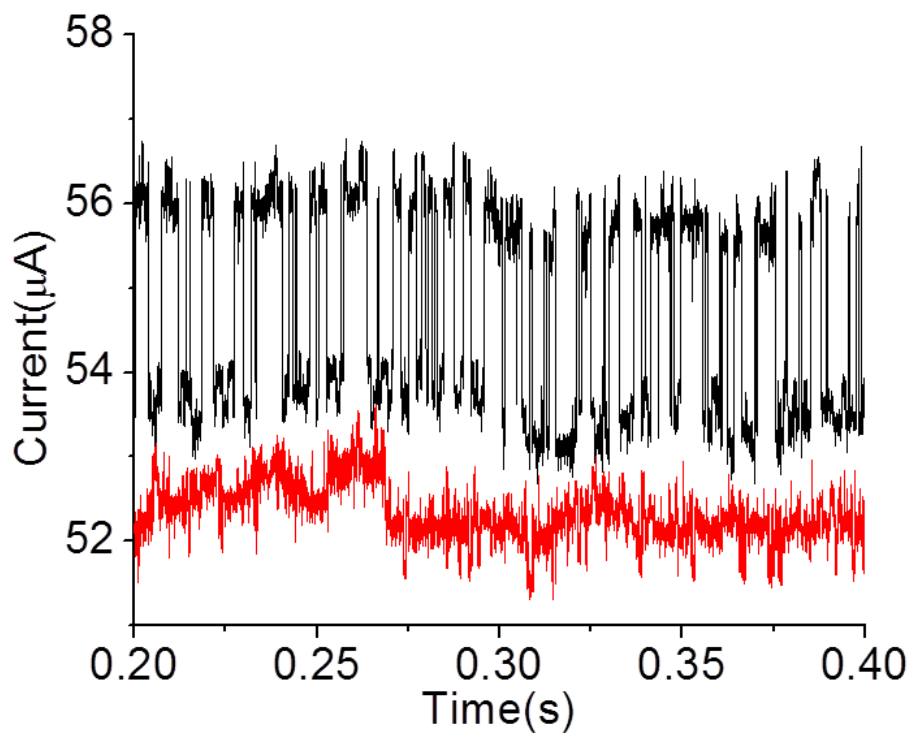

**Figure S1.** Current-time plots measured at 0.1V on the same device in HRS after two different set and reset processes.
